# Supplementary material for: Activation of Adenosine A3 Receptor Inhibits Microglia Reactivity Elicited by Elevated Pressure
Source: MDPI journal article supplement (doi:10.3390/ijms21197218), 2020-09-30
Supplement: s1 [file s1]

# Activation of adenosine A<sub>3</sub> receptor inhibits microglia reactivity elicited by elevated pressure

Joana Ferreira-Silva<sup>1,2,3</sup>, Inês D. Aires<sup>1,2,3</sup>, Raquel Boia<sup>1,2,3</sup>, António Francisco Ambrósio<sup>1,2,3</sup>, Ana Raquel Santiago<sup>1,2,3\*</sup>

<sup>1</sup>University of Coimbra, Coimbra Institute for Clinical and Biomedical Research (iCBR), Faculty of Medicine, Coimbra, Portugal;

<sup>2</sup>University of Coimbra, Center for Innovative Biomedicine and Biotechnology (CIBB), Coimbra, Portugal;

<sup>3</sup>Clinical Academic Center of Coimbra (CACC), Coimbra, Portugal.

<sup>4</sup>Association for Innovation and Biomedical Research on Light and Image, Coimbra, Portugal.

\* Correspondence: asantiago@fmed.uc.pt; Tel.: +351-239480226

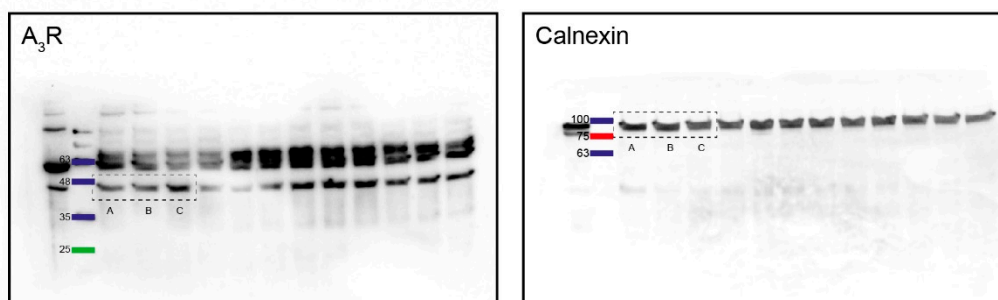

**Supplementary Figure 1.** Full length Western blots from cropped images depicted in Figure 1. Extracts were collected from BV-2 cells in control conditions (A), from BV-2 cells exposed to EHP for 24 hours (B) and from BV-2 cells treated with 2-Cl-IB-MECA (1  $\mu$ M) and then exposed to EHP for 24 hours (C).
